# Supplementary material for: Identification of the Transcriptional Biomarkers Panel Linked to Pathological Remodelling of the Eye Tissues in Various HD Mouse Models
Source: MDPI journal article supplement (doi:10.3390/cells11101675), 2022-05-18
Supplement: s1 [file s1]

# SUPPLEMENTARY FIGURE

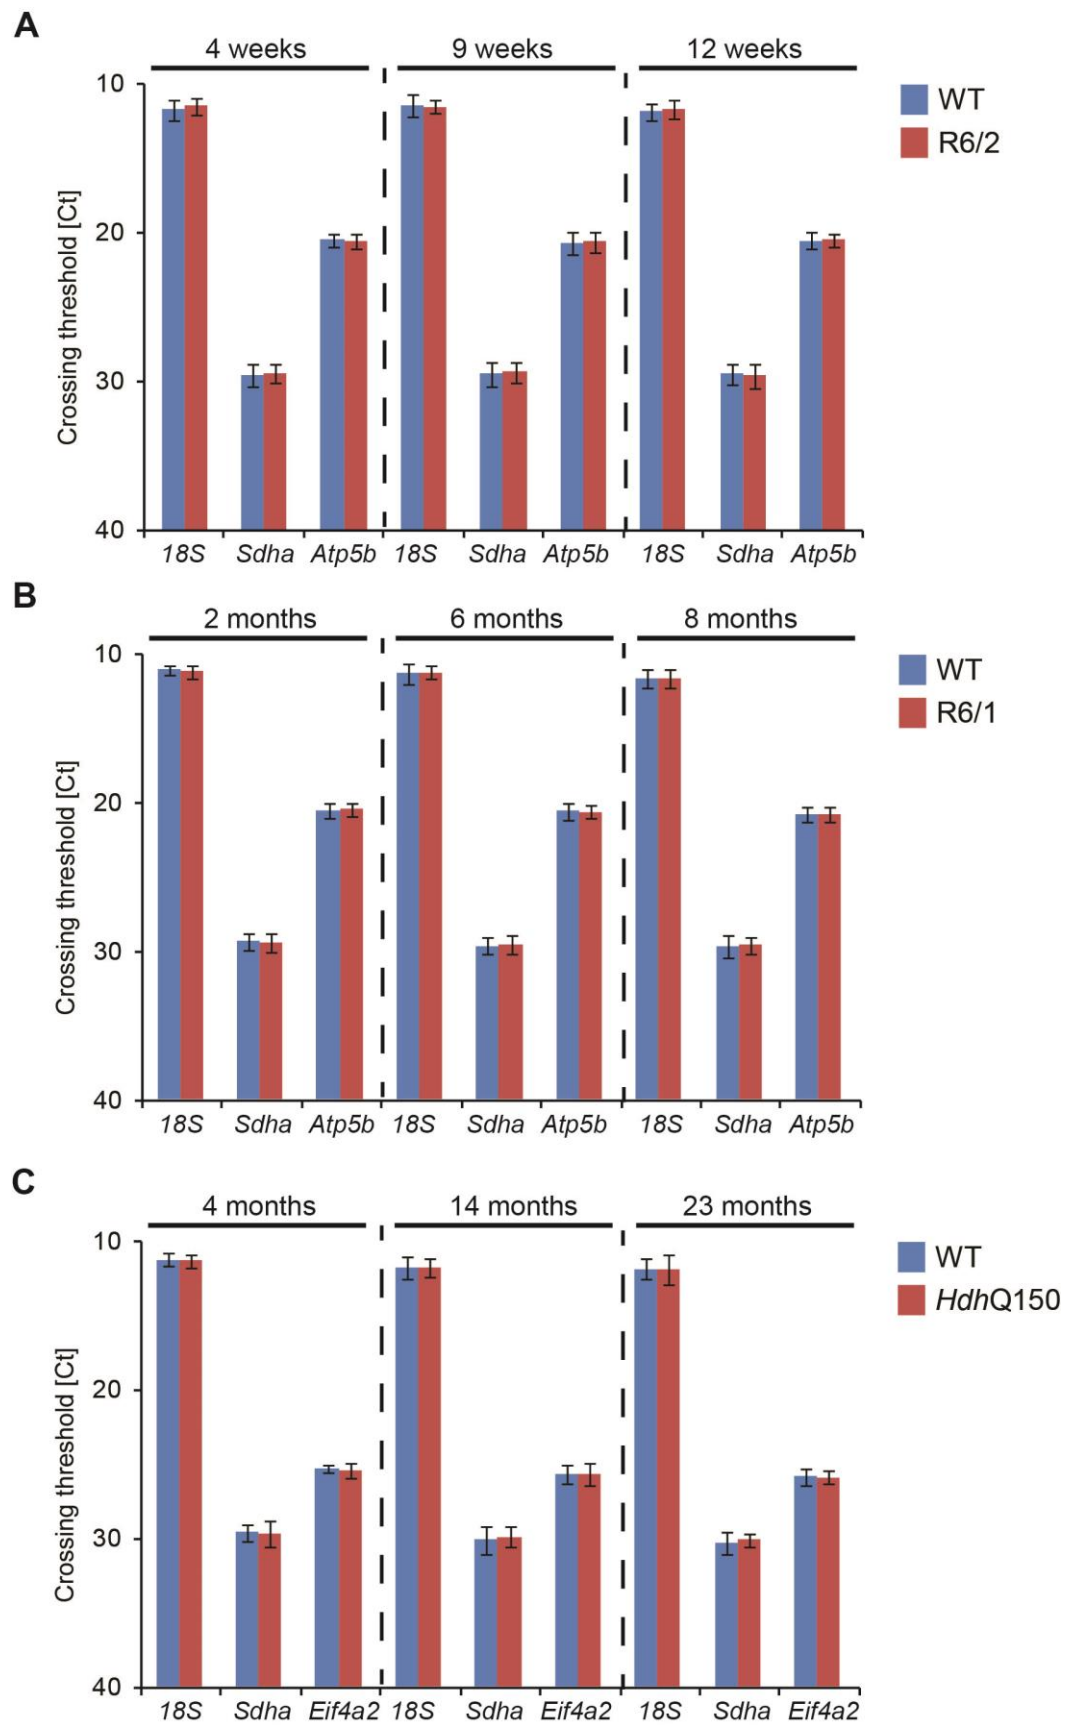

**Figure S1.** Identification of reference genes for qPCR from the eye tissues of HD mouse models. GeNorm analysis was used to identify optimal reference genes. Raw crossing threshold (Ct) data for a panel of three reference genes from the geNorm kit are shown (A) R6/2 mouse model at the age of 4 weeks, 9 weeks and 12 weeks, (B) R6/1 mouse model at the age of 2 months, 6 months and 8 months, (C) *Hdh*Q150 mouse model at the age of 4 months, 14 months and 23 months. *Sdha* (Succinate dehydrogenase complex, subunit A, 66945), *18S* (18S rRNA, 19791), *Eif4A2* (Eukaryotic translation initiation factor 4A2, 13682), *Atp5b* (ATP synthase subunit, 11947).
